# Supplementary material
Source: PubMed Central journal article supplement (PMC4498199)
Supplement: supp_tpc.114.135848_tpc135848_SupplementalData.pdf [file supp_tpc.114.135848_tpc135848_SupplementalData.pdf]

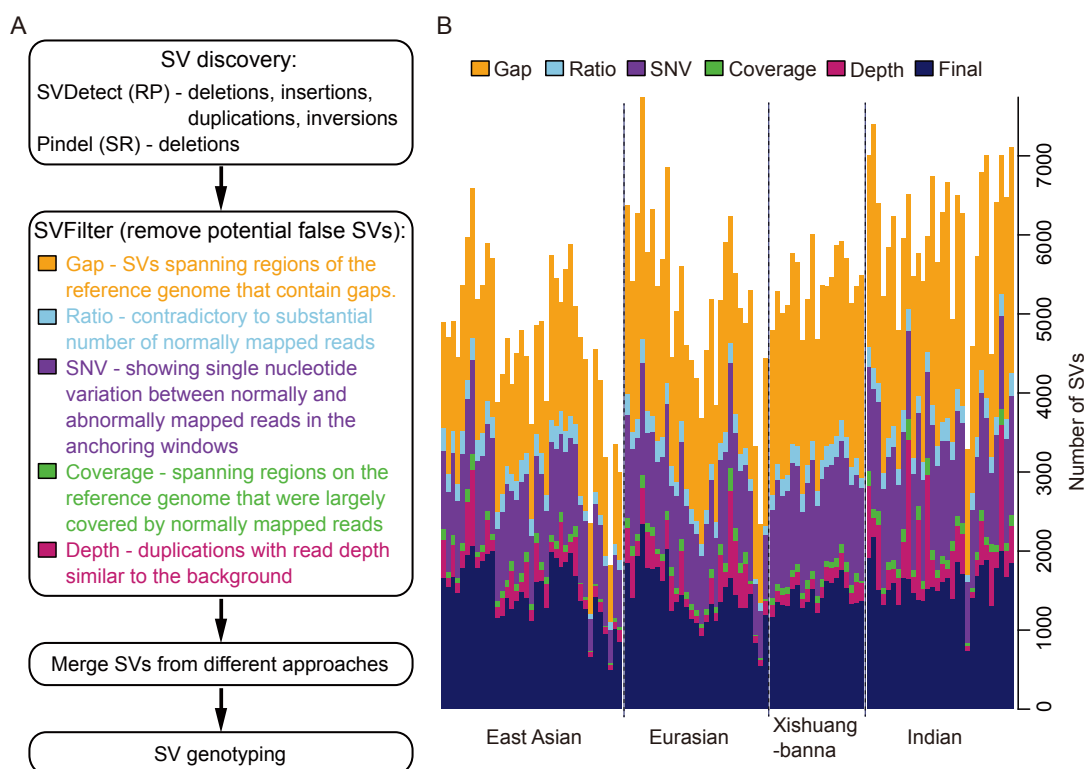

**Supplemental Figure 1.** SV discovery, filtering and genotyping. (A) Pipeline for SV discovery, filtering and genotyping. (B) Number of SVs in each of the 115 accessions after each filtering process. Potential false positive SVs were filtered sequentially by the five filters (gap→ratio→SNV→coverage→depth), thus SVs that could be filtered by more than one filter were only counted in the first applied filter. The accessions were ordered as listed in Supplemental Data Set 1.

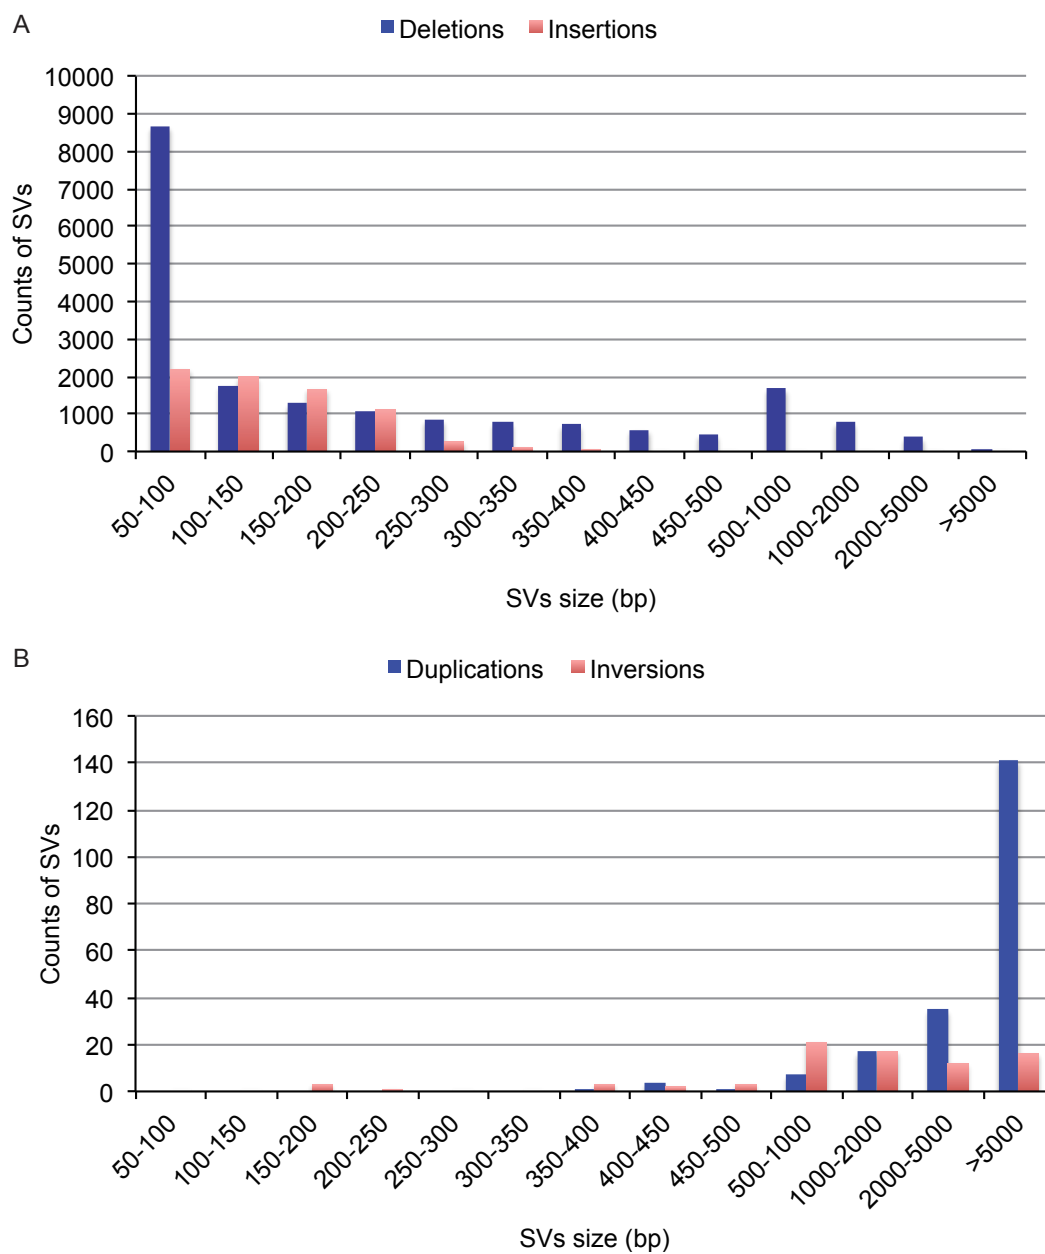

**Supplemental Figure 2.** Size distribution of identified SVs.

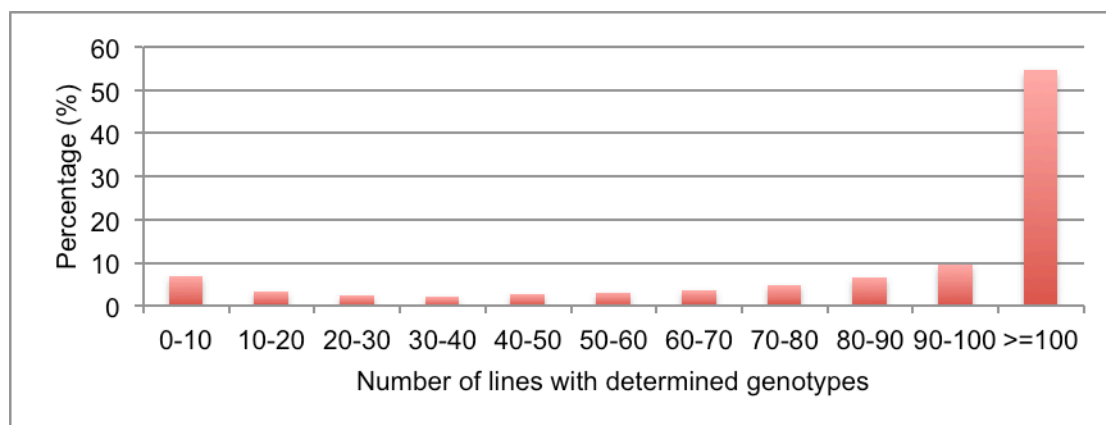

**Supplemental Figure 3.** Genotyping summary of cucumber SVs in the 115 accessions.

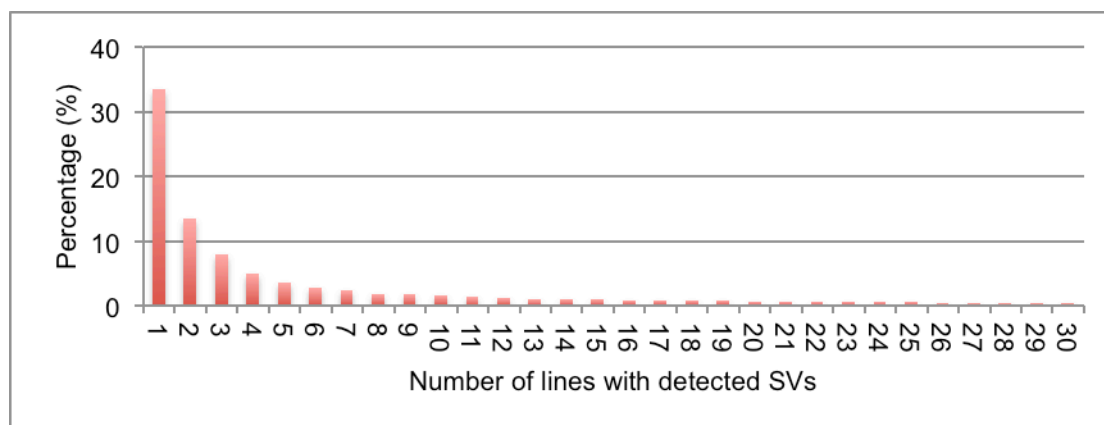

**Supplemental Figure 4.** Distribution of different numbers of accessions for which a structural variation was detected compared to the reference genome. About 33% of the SVs only occur in one accession of the core collection.

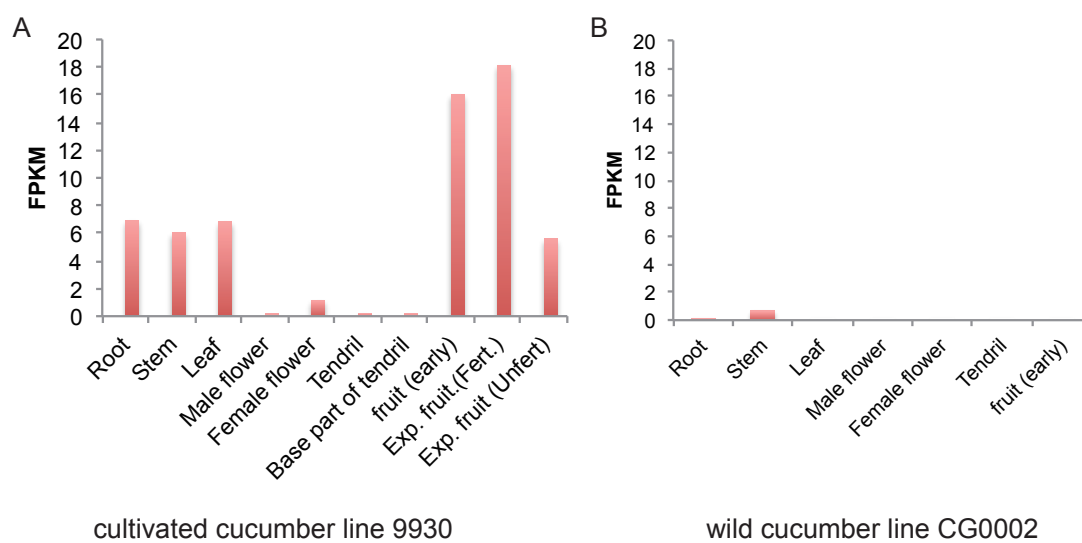

**Supplemental Figure 5.** Expression profile of *Csa2G237130* in cultivated cucumber line 9930 (A) and wild line CG0002 (B).

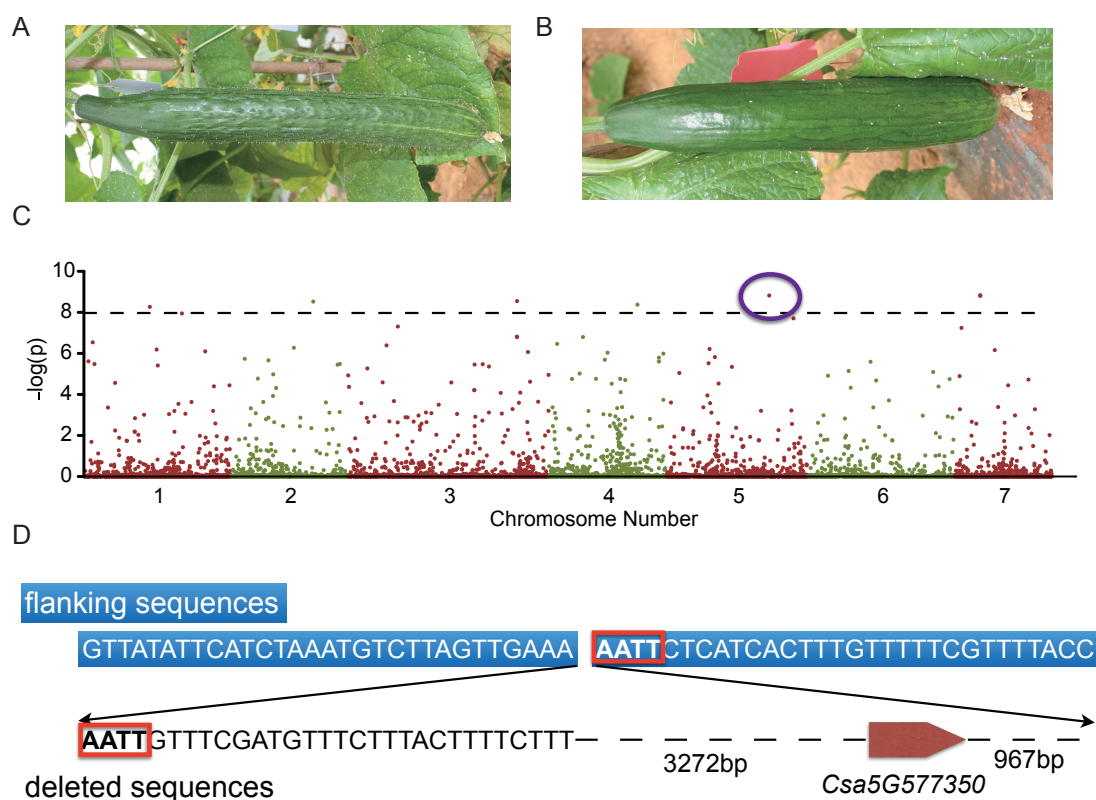

**Supplemental Figure 6.** SVs associated with tuberculate fruit in cucumber. Cucumber fruits with tubercles (A) and smoother appearance (B). (C) Manhattan plot of GWAS using the SV set for tuberculate fruit. (D) Sequences at the breakpoint of the deletion. The microhomologs AATT might be responsible for the formation of this deletion.

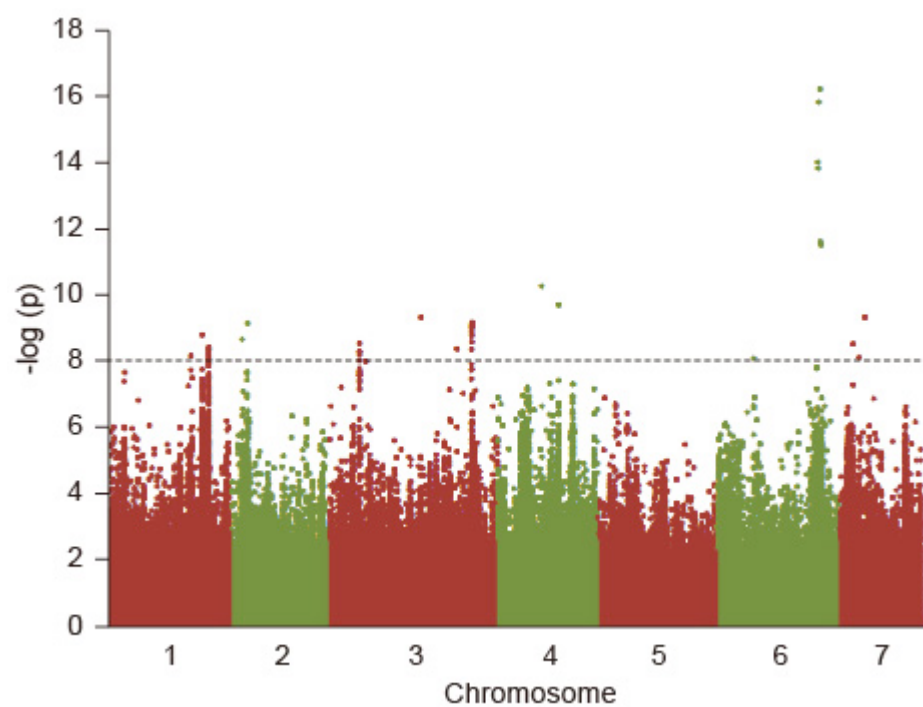

**Supplemental Figure 7.** Manhattan plot of GWAS using the SNP set for the gynoecy phenotype.

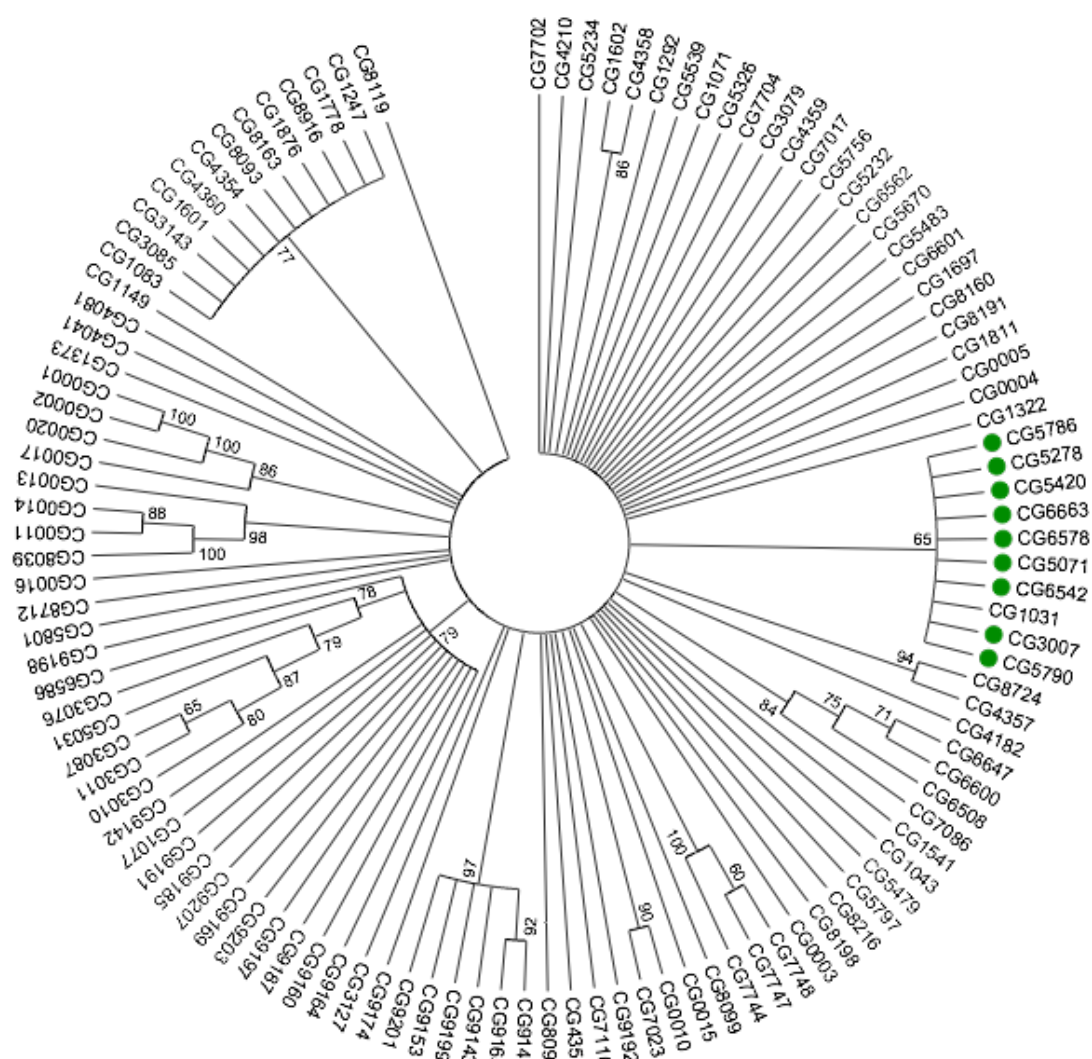

**Supplemental Figure 8.** Phylogenetic relationships of the 115 cucumber accessions based on the SNPs within the 30.2-kb duplicated region (*F* locus). Accessions marked by green circles are gynocious. The branches with low support value (<60) were condensed to avoid the confusion of relationships with low confidence.



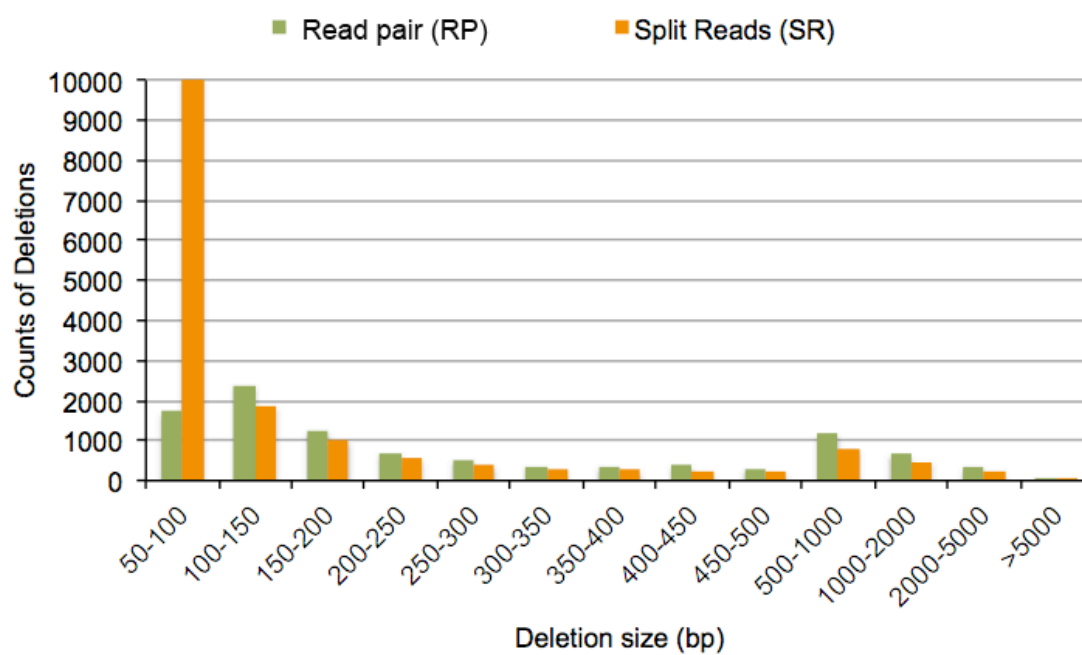

**Supplemental Figure 9.** Size distribution of deletions detected by read pair (RP) and split read (SR) approaches.

**Supplemental Table 1.** SVs predicted to be full-length LTR retrotransposons.

| SV ID        | chromosome | SV left window |          | SV right window |          | SV type  |
|--------------|------------|----------------|----------|-----------------|----------|----------|
|              |            | Start          | End      | Start           | End      |          |
| SV1G00237800 | Chr1       | 16940777       | 16940777 | 16945383        | 16945383 | deletion |
| SV1G00324300 | Chr1       | 22186523       | 22186523 | 22188315        | 22188315 | deletion |
| SV2G00261700 | Chr2       | 18392804       | 18392804 | 18394273        | 18394273 | deletion |
| SV3G00131400 | Chr3       | 11152955       | 11152955 | 11154992        | 11154992 | deletion |
| SV3G00301200 | Chr3       | 22411125       | 22411125 | 22415576        | 22415576 | deletion |
| SV3G00315300 | Chr3       | 23465804       | 23465804 | 23471293        | 23471293 | deletion |
| SV4G00149000 | Chr4       | 10272463       | 10272463 | 10277765        | 10277765 | deletion |
| SV5G00036800 | Chr5       | 2617628        | 2617628  | 2634155         | 2634155  | deletion |
| SV5G00135800 | Chr5       | 10756388       | 10756388 | 10757931        | 10757931 | deletion |
| SV5G00173600 | Chr5       | 13536061       | 13536061 | 13539551        | 13539551 | deletion |
| SV5G00242200 | Chr5       | 19033877       | 19033877 | 19035220        | 19035220 | deletion |
| SV6G00280500 | Chr6       | 18939086       | 18939086 | 18940983        | 18940983 | deletion |
